# Supplementary material for: A facile one-step hydrothermal synthesis of α-Fe2O3nanoplates imbedded in graphene networks with high-rate lithium storage and long cycle life
Source: Royal Society of Chemistry journal article supplement (doi:10.1039/c4ta03152k), 2014-01-01
Supplement: c4ta03152k1.pdf [file c4ta03152k1.pdf]

Electronic Supplementary Material (ESI) for Journal of Materials Chemistry A  
This journal is © The Royal Society of Chemistry 2014

## Supporting Information

### A facile one-step hydrothermal synthesis of $\alpha$ -Fe<sub>2</sub>O<sub>3</sub> nanoplates imbedded in graphene networks with high rate lithium storage and long cycle life

Shuangke Liu \*, Zhongxue Chen , Kai Xie, Yujie Li, Jing Xu and Chunman Zheng \*

College of Aerospace Science and Engineering, National University of Defense Technology, Changsha, 410073, China.

E-mail: liu\_sk@139.com;zhengchunman@hotmail.com

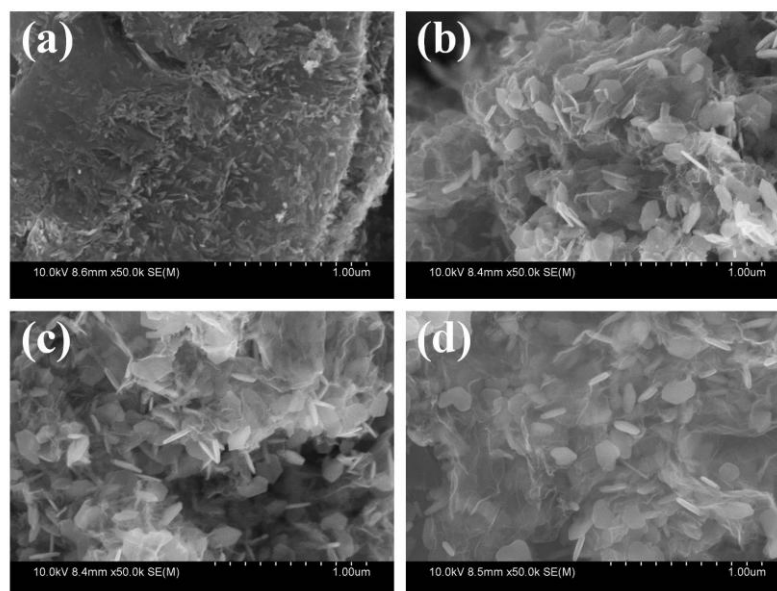

**Figure S1.** SEM images of the samples prepared under different temperature: (a)120°C; (b) 140°C; (c) at 160°C; (d)180°C.

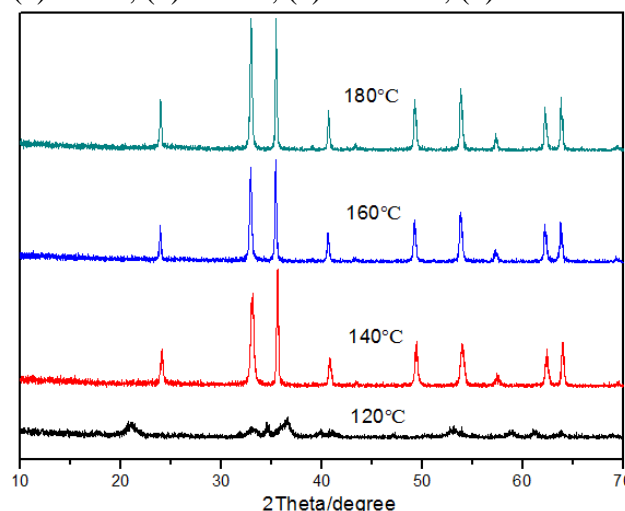

**Figure S2.** XRD of the samples prepared under different temperature

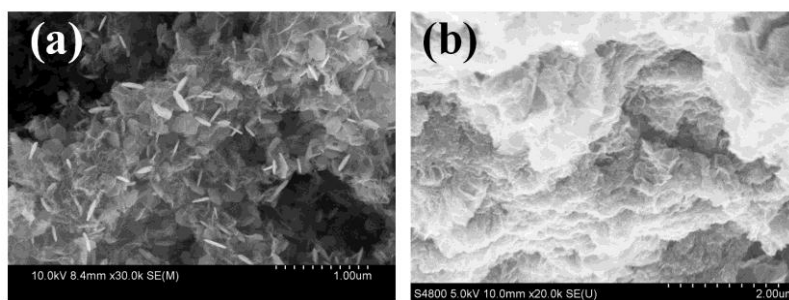

**Figure S3.** SEM images of (a) the rGO/ $\alpha$ -Fe<sub>2</sub>O<sub>3</sub> nanoplate composite and (b) rGO without adding FeSO<sub>4</sub> · 7H<sub>2</sub>O

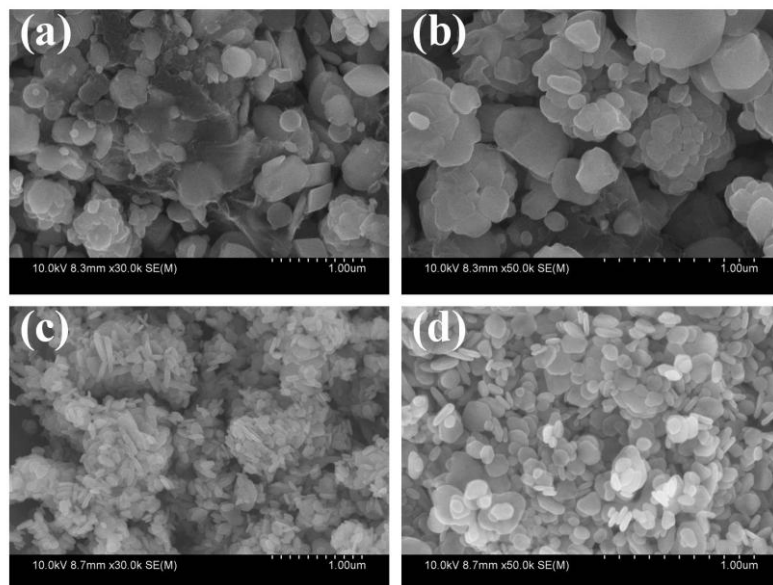

**Figure S4.** SEM images of the samples prepared without adding of glycerol (a) (b) and without adding of graphene oxide (c) (d)

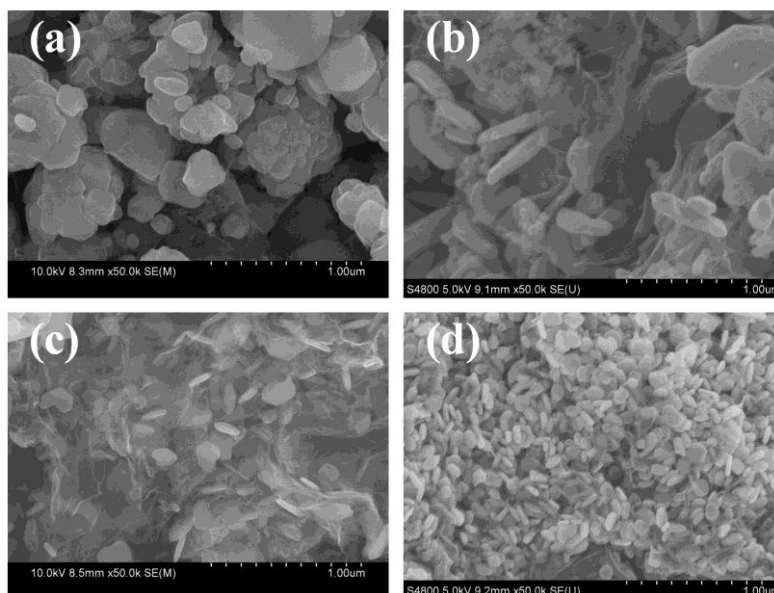

**Figure S5.** SEM images of the samples prepared with different amount of glycerol (a) 0ml, (b) 10ml, (c) 20ml, (d) 40ml while the total amount of the solvent kept unchanged

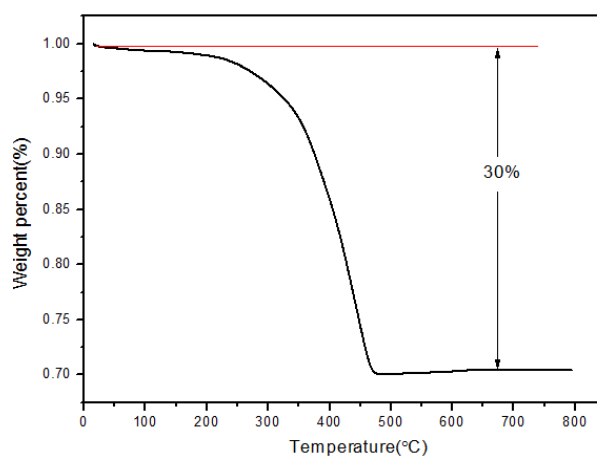

**Figure S6.** TG curves of the samples prepared at 180 °C

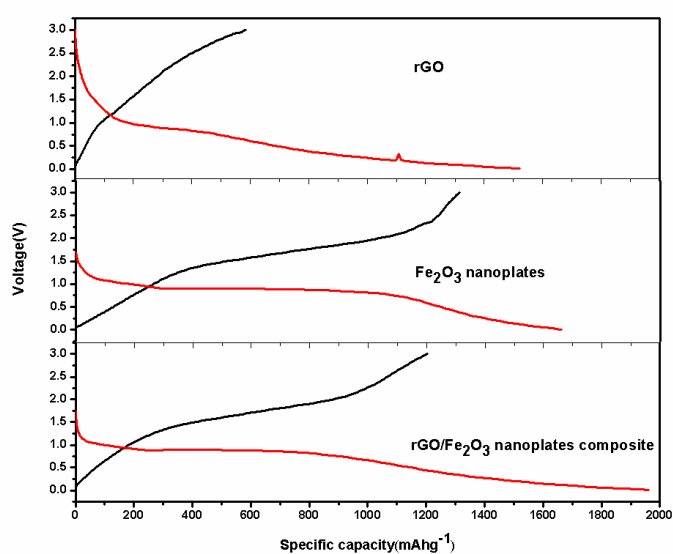

**Figure S7.** The representative charge-discharge curves of the rGO,  $\alpha$ -Fe<sub>2</sub>O<sub>3</sub> nanoplates and rGO/ $\alpha$ -Fe<sub>2</sub>O<sub>3</sub> nanoplate composite for the first cycle.

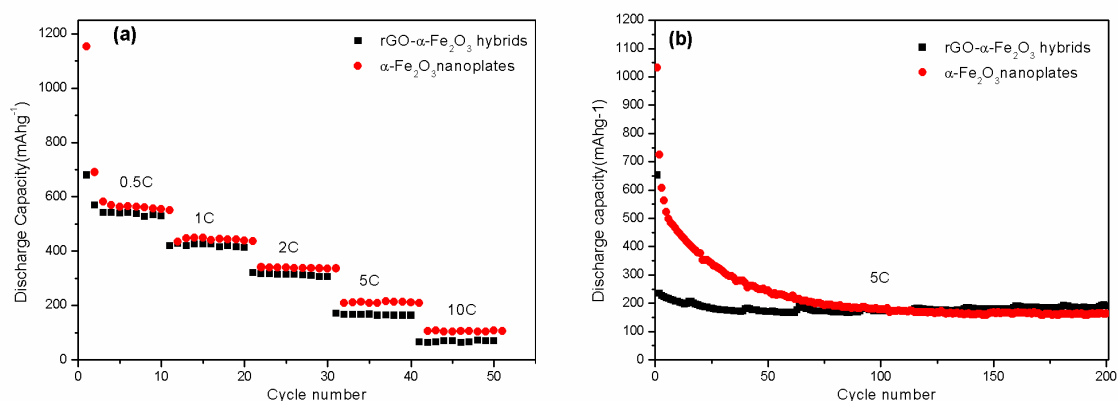

**Figure S8.** Rate performance (a) and cycling performance at 5C rate (b) of the samples prepared without adding of glycerol or graphene oxide
